# Supplementary material
Source: PubMed Central journal article supplement (PMC7158580)
Supplement: mmc1.pdf [file mmc1.pdf]

# THE LANCET

## Infectious Diseases

### Supplementary appendix

This appendix formed part of the original submission and has been peer reviewed.  
We post it as supplied by the authors.

Supplement to: Simpson S, Kaufmann MC, Glozman V, Chakrabarti A. Disease X: accelerating the development of medical countermeasures for the next pandemic. *Lancet Infect Dis* 2020; published online March 17. [https://doi.org/10.1016/S1473-3099\(20\)30123-7](https://doi.org/10.1016/S1473-3099(20)30123-7).

|                          |                                                                                   |
|--------------------------|-----------------------------------------------------------------------------------|
| Anastasia Older Aguilar  | The Bill & Melinda Gates Foundation                                               |
| Ron Aimes                | Mapp BioPharmaceuticals                                                           |
| Subhendu Basu            | Emergent BioSolutions                                                             |
| Virginia Benassi         | The World Health Organization                                                     |
| Chris Culver             | The Bill & Melinda Gates Foundation                                               |
| Keith Chirgwin           | The Bill & Melinda Gates Foundation                                               |
| Martine Denis            | The World Health Organization                                                     |
| Scott Dowell             | The Bill & Melinda Gates Foundation                                               |
| William Dowling          | The US National Institutes of Health                                              |
| Edward Dox               | The US Food and Drug Administration                                               |
| Peter Dull               | The Bill & Melinda Gates Foundation                                               |
| Ken Duncan               | The Bill & Melinda Gates Foundation                                               |
| Phil Gomez               | SIGA                                                                              |
| Jim Gallarda             | The Bill & Melinda Gates Foundation                                               |
| Elizabeth Higgs          | The US National Institutes of Health                                              |
| Peter Horby              | The University of Oxford                                                          |
| Walter Koch              | Roche Diagnostics                                                                 |
| Julie Ledgerwood         | The US National Institute of Allergy and Infectious Diseases                      |
| Ira Longini              | Center for Statistics and Quantitative Infectious Diseases. University of Florida |
| Murray Lumpkin           | The Bill & Melinda Gates Foundation                                               |
| Hillary Marston          | The US National Institute of Allergy and Infectious Diseases                      |
| Mike Mentessana          | PricewaterhouseCoopers                                                            |
| Tarit Mukhopadhyay       | University College London                                                         |
| Ana Maria Henao Restrepo | The World Health Organization                                                     |
| David Robinson           | The Bill & Melinda Gates Foundation                                               |
| Jim Robinson             | Independent consultant                                                            |
| David Blazes             | The Bill & Melinda Gates Foundation                                               |
| Raul Gomez Roman         | Coalition for Epidemic Preparedness Innovations                                   |
| Connie Schmaljohn        | US Army<br>Medical Research Institute of Infectious Diseases                      |
| Toshiyoshi Tominaga      | Japan Self-Medication Industry                                                    |
| David Vaughn             | The Bill & Melinda Gates Foundation                                               |
| Mike Whelan              | Coalition for Epidemic Preparedness Innovations                                   |
